# Supplementary material for: Coumarin Derivatives Inhibit ADP-Induced Platelet Activation and Aggregation
Source: MDPI journal article supplement (doi:10.3390/molecules27134054), 2022-06-23
Supplement: s1 [file s1]

## Article

# Coumarin Derivatives Inhibit ADP-Induced Platelet Activation and Aggregation

Ping-Hsun Lu <sup>1,2,†</sup>, Tzu-Hsien Liao <sup>1,†</sup>, Yau-Hung Chen <sup>3</sup>, Yeng-Ling Hsu <sup>4</sup>, Chan-Yen Kuo <sup>5</sup>, Chuan-Chi Chan <sup>6</sup>, Lu-Kai Wang <sup>7</sup>, Ching-Yuh Chern <sup>4,\*</sup> and Fu-Ming Tsai <sup>5,\*</sup>

<sup>1</sup> Department of Chinese Medicine, Taipei Tzu Chi Hospital, Buddhist Tzu Chi Medical Foundation, New Taipei City 231, Taiwan; pinghsunlu@gmail.com (P.-H.L.); a0958651263@gmail.com (T.-H.L.)

<sup>2</sup> School of Post-Baccalaureate Chinese Medicine, Tzu Chi University, Hualien 970, Taiwan

<sup>3</sup> Department of Chemistry, Tamkang University, New Taipei City 251, Taiwan; yauhung@mail.tku.edu.tw

<sup>4</sup> Department of Applied Chemistry, National Chia-Yi University, Chiayi City 600, Taiwan; s1100243@gmail.ncyu.edu.tw

<sup>5</sup> Department of Research, Taipei Tzu Chi Hospital, Buddhist Tzu Chi Medical Foundation, New Taipei City 231, Taiwan; cykuo863135@gmail.com

<sup>6</sup> Department of Laboratory Medicine, Taipei Tzu Chi Hospital, Buddhist Tzu Chi Medical Foundation, New Taipei City 231, Taiwan; kiki1205@tzuchi.com.tw

<sup>7</sup> Department of Life Sciences, Ministry of Science and Technology, Taipei 106, Taiwan; keratin14kaikai@gmail.com

\* Correspondence: cychern@mail.ncyu.edu.tw (C.-Y.C.); afu2215@gmail.com (F.-M.T.); Tel.: +886-5-2717970 (C.-Y.C.); +886-2-66289779-5793 (F.-M.T.)

† These authors contributed equally to this work.

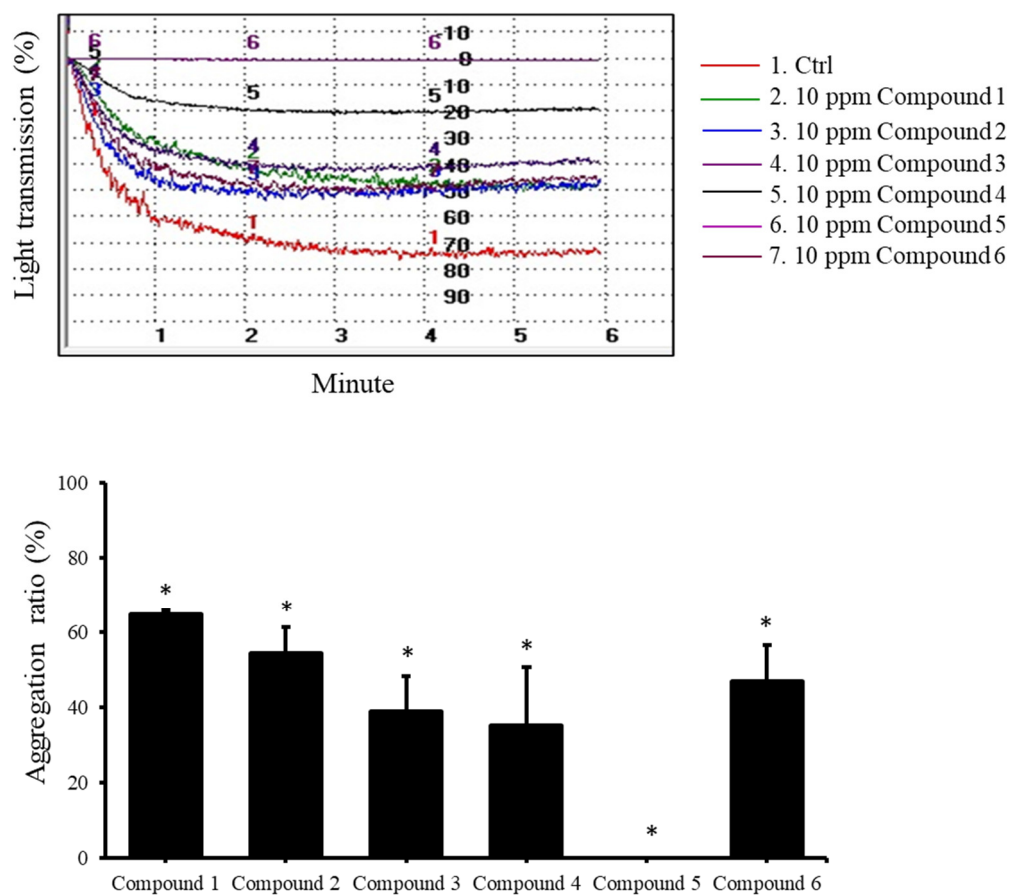

**Figure S1.** Effects of coumarin derivatives on collagen-induced platelet aggregation. Human PRP was treated with DMSO (control) or 10 ppm of coumarin derivatives for 30 min, followed by addition of 5 µg/mL collagen, and aggregation was analyzed using an aggregometer for 6 minutes. The data are presented as the aggregation ratio relative to control group treated with collagen only (n = 3). \*p < 0.05 compared with the control group treated with collagen only.

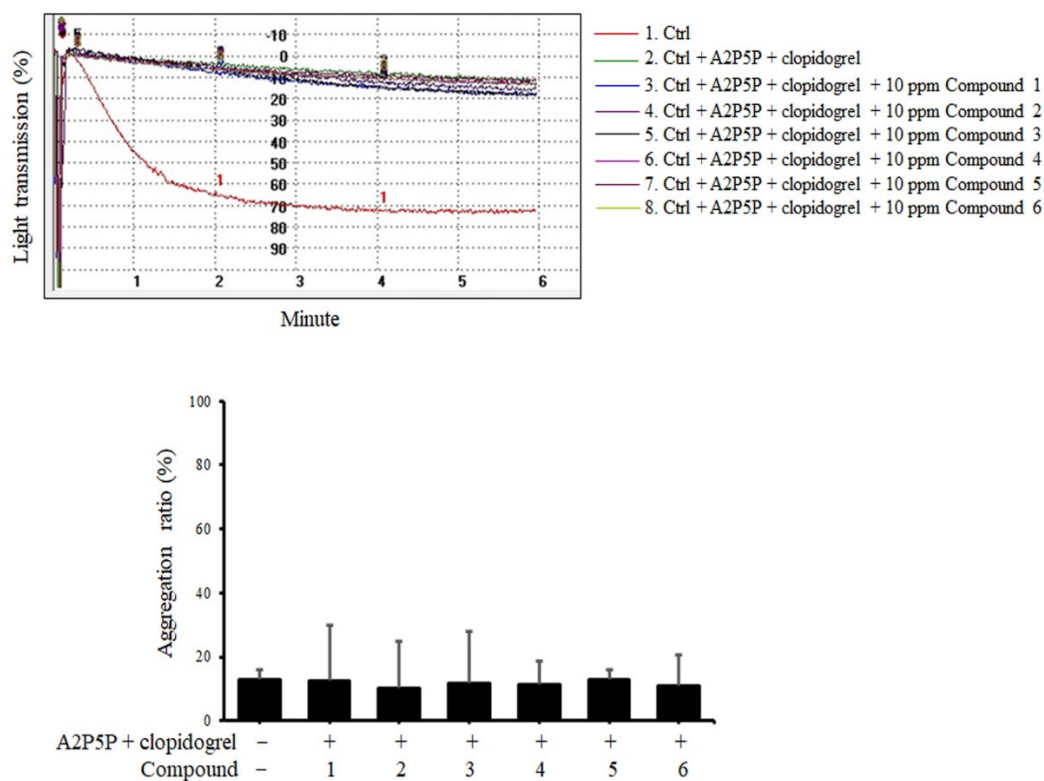

**Figure S2.** Effects of the ADP receptor antagonist on the inhibition of platelet aggregation by coumarin derivatives. Human PRP was treated with 10 ppm of coumarin derivatives, 10  $\mu$ M ADP alone or in the presence both of 1mM A2P5P and 1 mM clopidogrel. Aggregation was analyzed using an aggregometer for 6 minutes. The data are presented as the aggregation ratio relative to control group treated with ADP only (n = 3).

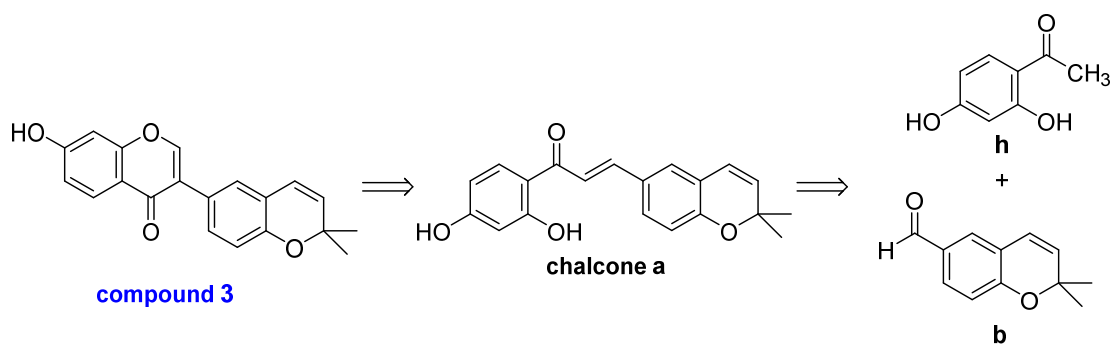

Scheme 1

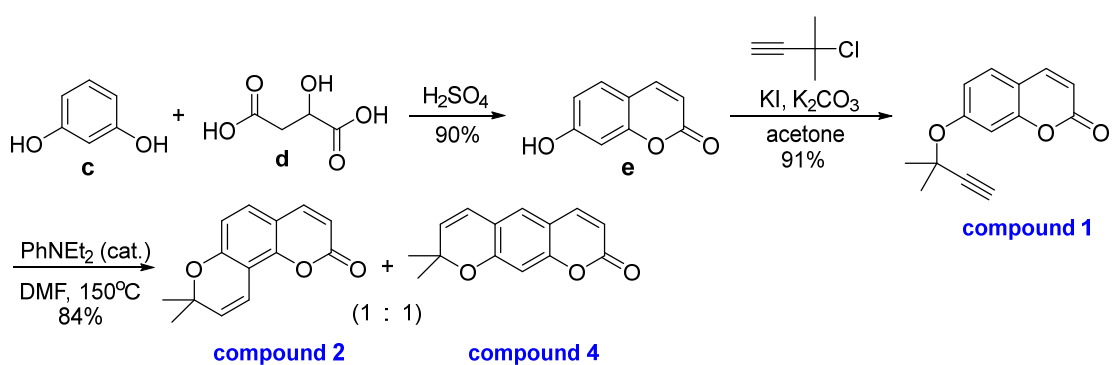

Scheme 2

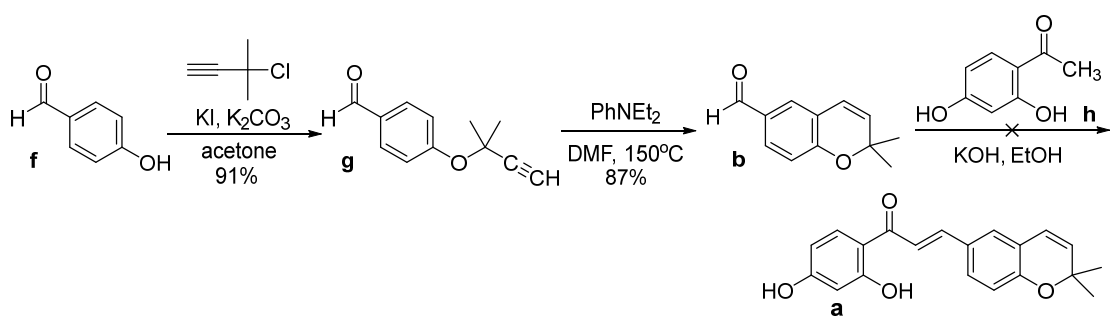

Scheme 3

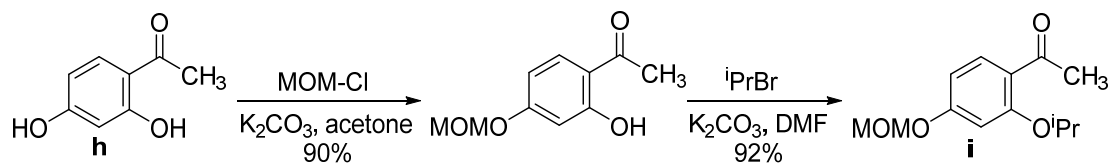

Scheme 4

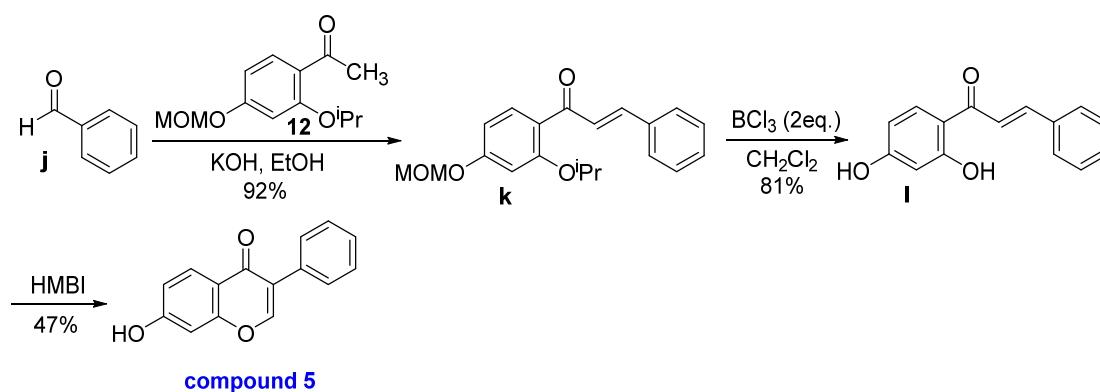

Scheme 5

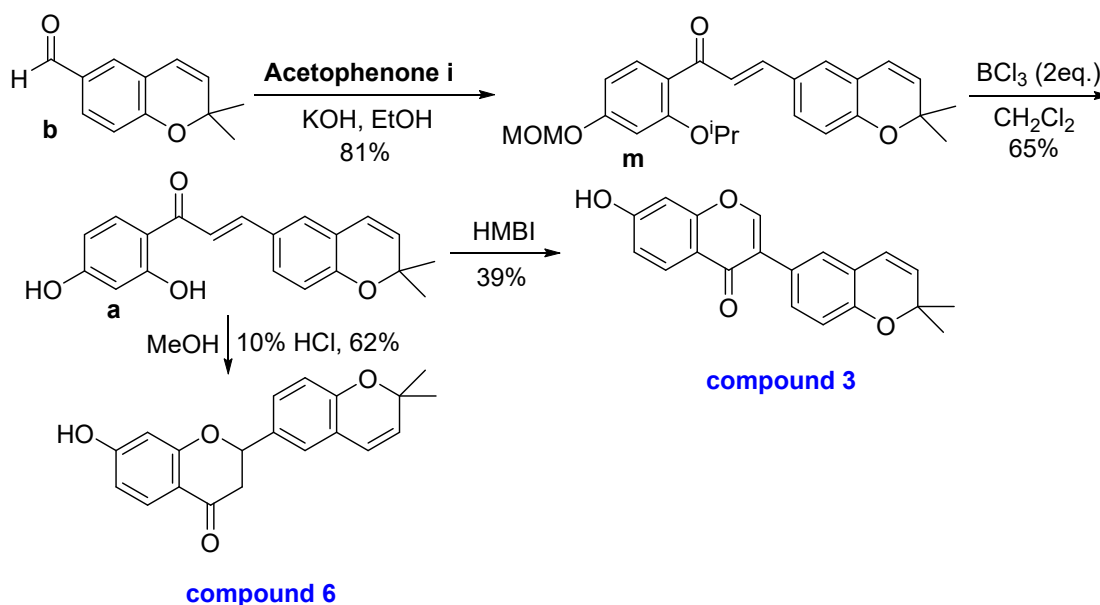

Scheme 6

Figure S3. Chemistry.

Using corylin 1 (**compound 3**) as our target product, there were several different synthetic methods to accomplish this synthesis. We used oxidative rearrangement of chalcone **a** to obtain the target product, and chalcone **a** was obtained via aldol condensation with acetophenone **h** and chromene **b** (Scheme 1). In the initial step, we used compound **e** as the starting material to establish the reaction conditions suitable for obtaining chromene **b**. Resorcinol **c** was reacted with 2-hydroxysuccinic acid **d** to yield coumarin 7-hydroxy-2H-chromene-2-one **7** with 90% yield. Compound **e** was reacted in 3-chloro-3-methylbut-1-yne, KI, K<sub>2</sub>CO<sub>3</sub> after refluxing in acetone for 45 hours, and 91% of **compound 1** was obtained via extraction and purification. In the presence of a catalyst amount of PhNEt<sub>2</sub> and solvent DMF, a high-temperature cyclization reaction was performed at 150 °C for 10 hours. After extraction and purification, 84% of **compound 2** and **compound 4** were obtained (ratio 1:1). The mixture was purified through silica gel to obtain **compound 2** and **compound 4** with 42% yield (Scheme 2).

We used the same reaction conditions to convert aldehyde **f** to compound **b**. The yields of the two steps were 91% and 87%, respectively. We performed aldol condensation on compounds **b** and 2,4-dihydroxy acetophenone **h** under alkaline conditions, but the expected product was not obtained as a result of the reaction (Scheme 3). It is possible that intramolecular hydrogen bonds in acetophenone **h** prevent aldol reactions. Therefore, *O*-isopropyl, *P*-MOM, and acetophenones **i** were used as the starting materials for alternative synthesis. The preparations of *O*-isopropyl, *P*-MOM, and acetophenones **i** were straightforward. Acetophenone **h** was protected with MOMCl at the para-OH, and the ortho-OH was protected as -O<sup>i</sup>Pr with isopropyl bromide, and approximately 83% of product **i** was obtained (Scheme 4).

The aldol reaction between acetophenone **i** and benzaldehyde **j** was performed to obtain chalcone **k** with a yield of 92%. Appropriate conditions for deprotection and oxidative rearrangement were then tested with compound **k**. The *O*-isopropyl ether and *O*-MOM ether were removed with BCl<sub>3</sub> (2 eq.) to afford chalcone **l** with 81% yield. We performed an oxidative rearrangement reaction with chalcone **l** and HMBI, which only 15% of the target product was obtained. We increased the purity of HMBI by altering the solvent and temperature of the reaction. Finally, oxidative rearrangement was performed at >95% purity of HMBI and chalcone **l** under refluxing MeOH to obtain 47% isolated **compound 5** (Scheme 5).

We used the same reaction conditions, aldol condensation of aldehyde **b** and acetophenone **i**, to yield chalcone **m** with a yield of 81%. Then, *O*-isopropyl ether and *O*-MOM ether were cleaved by 2 equivalents of BCl<sub>3</sub> to afford chalcone **a** in 65% yield. Finally, HMBI was added to perform oxidative rearrangement to obtain 39% of the target product **compound 3**. Alternatively, chalcone **a** was cyclized in 10% HCl to obtain **compound 6** with 62% yield (Scheme 6).
